# Supplementary material for: Cutaneous Leishmaniasis and Sand Fly Fluctuations Are Associated with El Niño in Panamá
Source: PubMed Central journal article supplement (PMC4183471; doi:10.1371/journal.pntd.0003210), 2014-10-02

# A

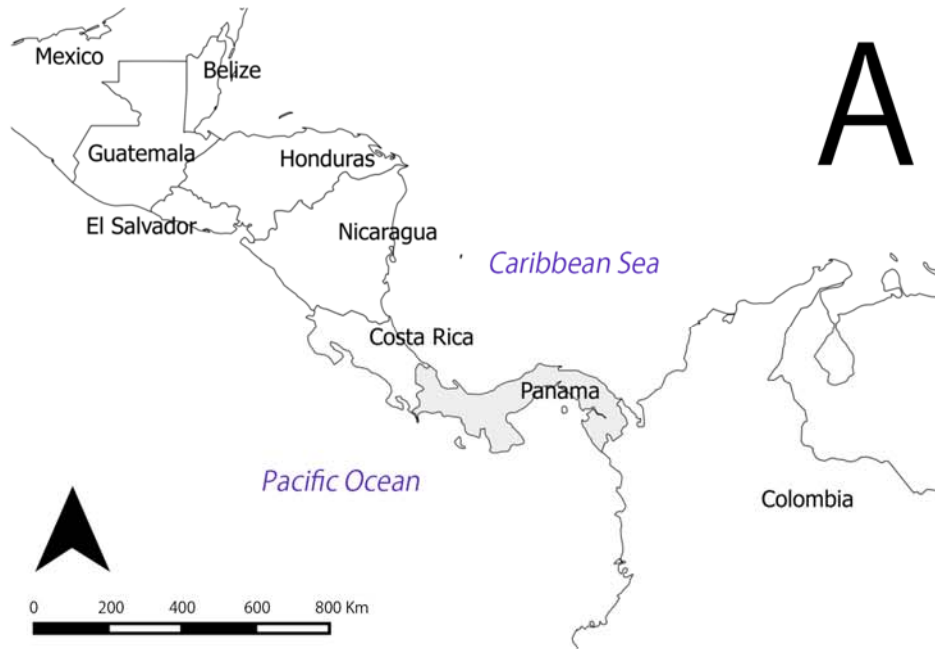

# B

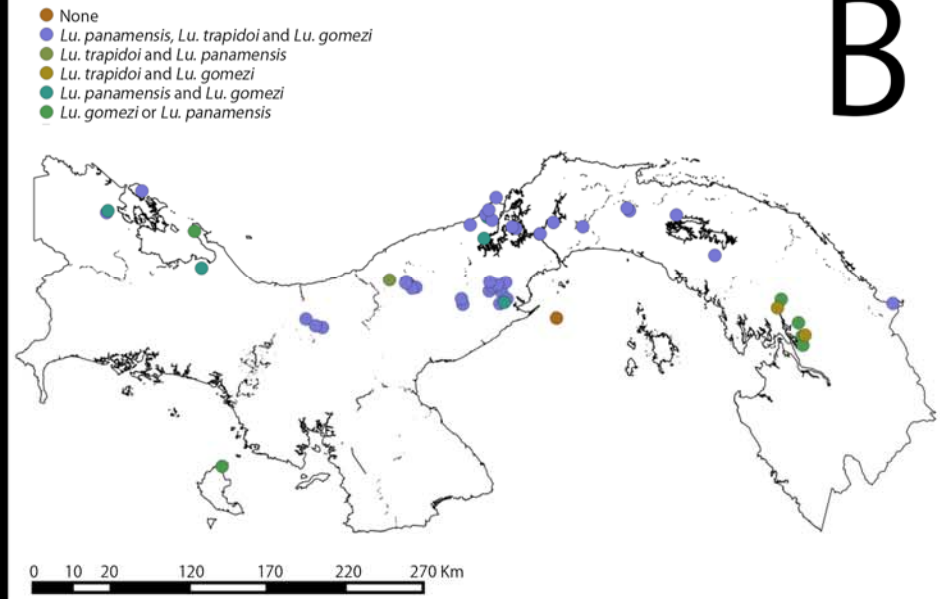

# C

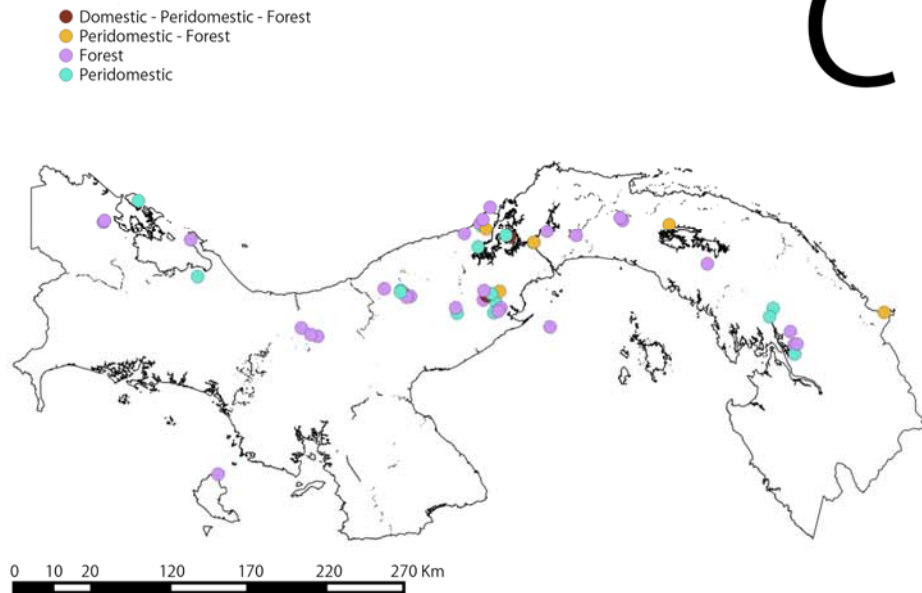

# D

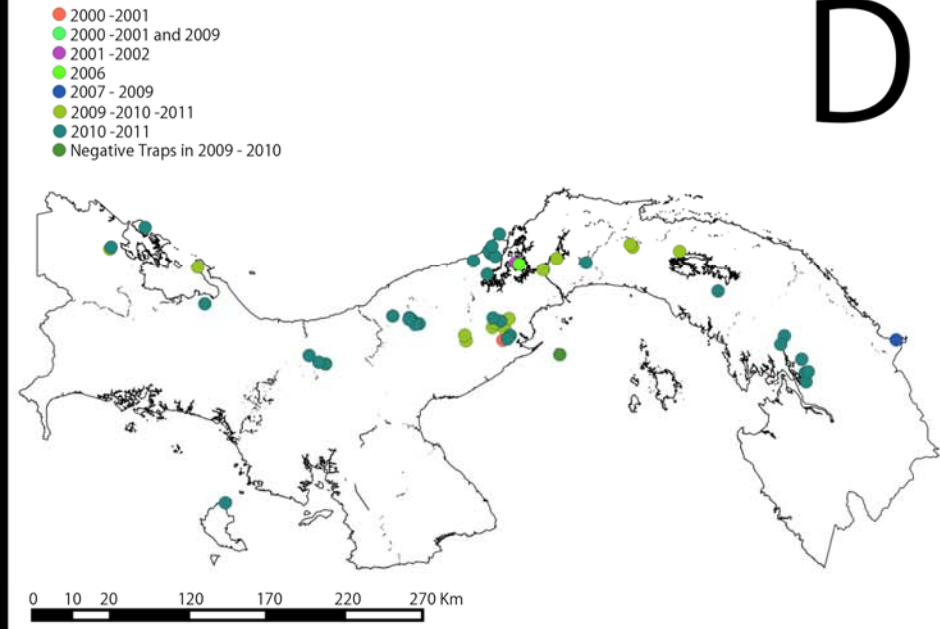

Supplement: pntd.0003210.s001.pdf [file pntd.0003210.s001.pdf]
