# Supplementary material for: Cutaneous Leishmaniasis and Sand Fly Fluctuations Are Associated with El Niño in Panamá
Source: PubMed Central journal article supplement (PMC4183471; doi:10.1371/journal.pntd.0003210), 2014-10-02

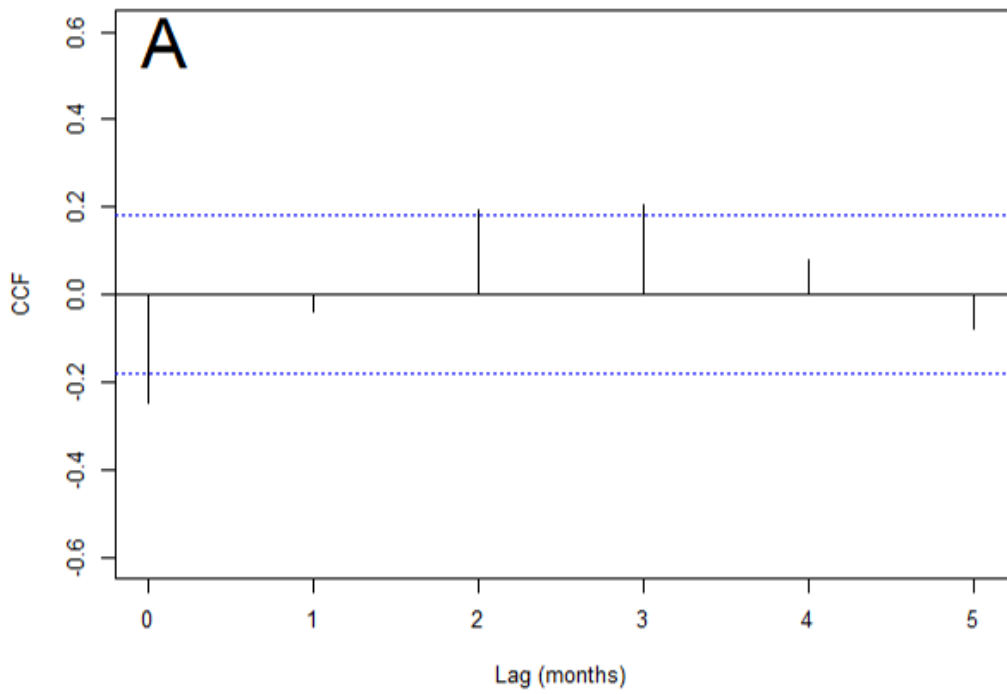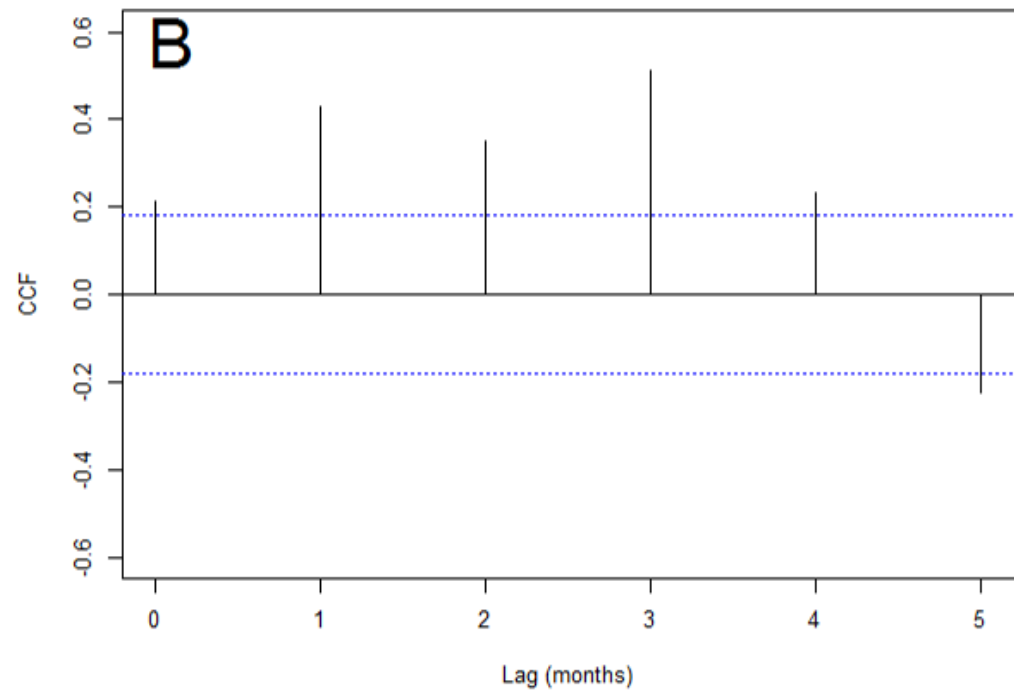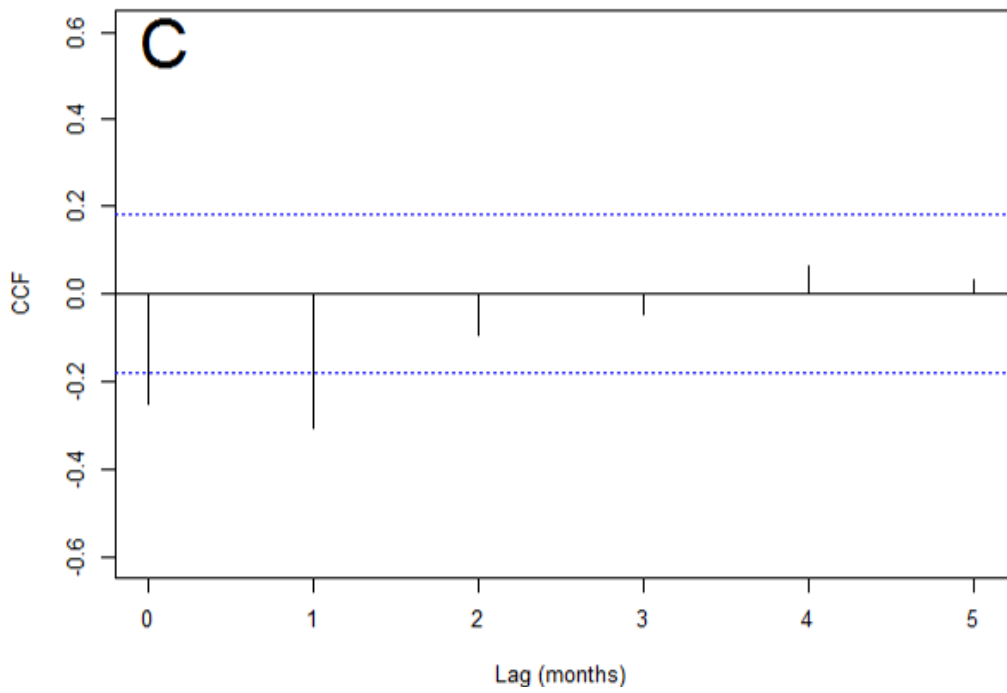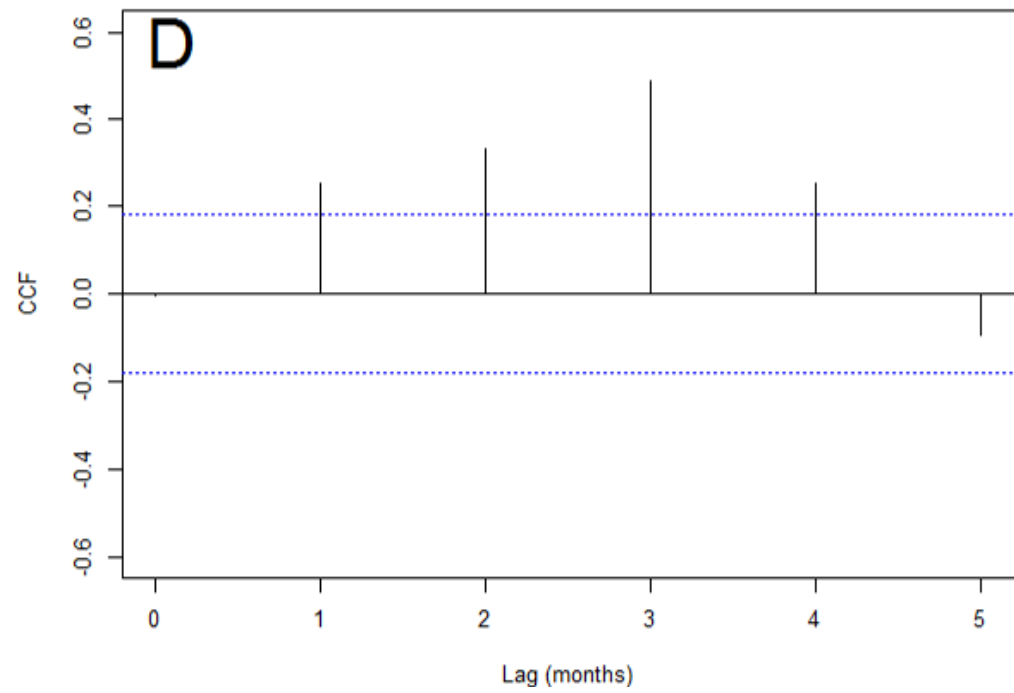

Supplement: pntd.0003210.s005.pdf [file pntd.0003210.s005.pdf]
