# Supplementary material for: Cutaneous Leishmaniasis and Sand Fly Fluctuations Are Associated with El Niño in Panamá
Source: PubMed Central journal article supplement (PMC4183471; doi:10.1371/journal.pntd.0003210), 2014-10-02
Supplement: pntd.0003210.s006.pdf [file pntd.0003210.s006.pdf]

**Table S1 Model Selection.** Columns indicate the type of model (models): Null, full or the backward elimination round, the autoregressive (Autoregressive) and seasonal (Seasonal) order, the covariates, including inside parenthesis the lag (Covariates(Lag)) and the Akaike Information Criterion (AIC), a model selection which is minimized by the best model. The best model for the null and full models and each selection round are **bolded**. o and x indicate, respectively, the presence or absence of a variable in a model. SST4, Temp and Rain are, respectively, abbreviations for Sea Surface Temperature 4 (El Niño 4 Index), Temperature and Rainfall.

| Models      | Autoregressive |     |     | Seasonal<br>12th | Covariates (Lag) |         |          |          |          | AIC         |
|-------------|----------------|-----|-----|------------------|------------------|---------|----------|----------|----------|-------------|
|             | 1st            | 2nd | 3rd |                  | SST4(4)          | SST4(5) | SST4(12) | Temp(13) | Rain(15) |             |
| Null Models | o              | o   | o   | o                | x                | x       | x        | x        | x        | <b>1489</b> |
|             | o              | o   | x   | o                | x                | x       | x        | x        | x        | 1494        |
|             | o              | x   | x   | o                | x                | x       | x        | x        | x        | 1497        |
| Full        | o              | o   | o   | o                | o                | o       | o        | o        | o        | <b>1296</b> |
|             | o              | o   | o   | o                | o                | o       | o        | o        | x        | 1296        |
|             | o              | o   | o   | o                | o                | o       | o        | x        | o        | 1305        |
| 1st Round   | o              | o   | o   | o                | o                | o       | x        | o        | o        | 1297        |
|             | o              | o   | o   | o                | o                | x       | o        | o        | o        | <b>1294</b> |
|             | o              | o   | o   | o                | x                | o       | o        | o        | o        | 1302        |
|             | o              | o   | o   | x                | o                | o       | o        | o        | o        | 1296        |
|             | o              | o   | x   | o                | o                | o       | o        | o        | o        | 1295        |
|             | o              | x   | x   | o                | o                | o       | o        | o        | o        | 1309        |
|             | o              | o   | o   | o                | o                | x       | o        | o        | x        | 1295        |
|             | o              | o   | o   | o                | o                | x       | o        | x        | o        | 1303        |
| 2nd Round   | o              | o   | o   | o                | o                | x       | x        | o        | o        | 1296        |
|             | o              | o   | o   | o                | x                | x       | o        | o        | o        | 1300        |
|             | o              | o   | o   | x                | o                | x       | o        | o        | o        | 1296        |
|             | o              | o   | x   | o                | o                | x       | o        | o        | o        | <b>1293</b> |
|             | o              | x   | x   | o                | o                | x       | o        | o        | o        | 1308        |
|             | o              | o   | x   | o                | o                | x       | o        | o        | x        | <b>1293</b> |
|             | o              | o   | x   | o                | o                | x       | o        | x        | o        | 1302        |
| 3rd Round   | o              | o   | x   | o                | o                | x       | x        | o        | o        | 1308        |
|             | o              | o   | x   | o                | x                | x       | o        | o        | o        | 1294        |
|             | o              | o   | x   | x                | o                | x       | o        | o        | o        | 1294        |
|             | o              | x   | x   | o                | o                | x       | o        | o        | o        | 1307        |
|             | o              | o   | x   | o                | o                | x       | o        | x        | x        | 1303        |
| 4th Round   | o              | o   | x   | o                | o                | x       | x        | o        | x        | 1310        |
|             | o              | o   | x   | o                | x                | x       | o        | o        | x        | 1297        |
|             | o              | o   | x   | x                | o                | x       | o        | o        | x        | <b>1293</b> |
|             | o              | x   | x   | o                | o                | x       | o        | o        | x        | 1307        |
