# Supplementary material for: Cutaneous Leishmaniasis and Sand Fly Fluctuations Are Associated with El Niño in Panamá
Source: PubMed Central journal article supplement (PMC4183471; doi:10.1371/journal.pntd.0003210), 2014-10-02
Supplement: pntd.0003210.s007.pdf [file pntd.0003210.s007.pdf]

**Table S2 Sand Fly vector species abundance model selection.** AIC and BIC stand, respectively, for Akaike and Bayesian Information Criteria. Best model selection is guided by their minimization. The symbol | indicates the nesting of random factors. Best models are **bolded**.

| Sand Fly Vector Species | Random Factors               | Fixed Factors                                               | BIC           | AIC           |
|-------------------------|------------------------------|-------------------------------------------------------------|---------------|---------------|
| <i>Lutzomyia gomezi</i> | Locations Study, Study, Year | ENSO Phase, sampling month, eco-epidemiological environment | 3267.4        | 3341.7        |
|                         | Locations, Year              | ENSO Phase, sampling month, eco-epidemiological environment | <b>3265.4</b> | <b>3335.8</b> |
| <i>Lu. trapidoi</i>     | Locations Study, Study, Year | ENSO Phase, sampling month, eco-epidemiological environment | 3547.3        | 3620.7        |
|                         | Locations, Year              | ENSO Phase, sampling month, eco-epidemiological environment | <b>3545.3</b> | <b>3614.8</b> |
| <i>Lu. panamensis</i>   | Locations Study, Study, Year | ENSO Phase, sampling month, eco-epidemiological environment | 7748.0        | 7820.3        |
|                         | Locations, Year              | ENSO Phase, sampling month, eco-epidemiological environment | <b>7748.0</b> | <b>7816.6</b> |
